# Supplementary material for: Sustained Incompatibility between MAPK Signaling and Pathogen Effectors
Source: Int J Mol Sci. 2020 Oct 26;21(21):7954. doi: 10.3390/ijms21217954 (PMC7672596; doi:10.3390/ijms21217954)
Supplement: Supplementary file 1 [file ijms-21-07954-s001.xlsm]

## Sheet: UpRegulated genes
Analysis Type:	PANTHER Overrepresentation Test (Released 20200407)
Annotation Version and Release Date:	GO Ontology database DOI: 10.5281/zenodo.3727280 Released 2020-03-23
Analyzed List:	upload_1 (Arabidopsis thaliana)
Reference List:	Arabidopsis thaliana (all genes in database)
Test Type:	FISHER
Correction:	BONFERRONI
Bonferroni count:	2822
GO biological process complete	Arabidopsis thaliana - REFLIST (27416)	upload_1 (628)	upload_1 (expected)	upload_1 (over/under)	upload_1 (fold Enrichment)	upload_1 (P-value)
indole-containing compound catabolic process (GO:0042436)	13	6	.30	+	20.15	7.35E-03
response to molecule of fungal origin (GO:0002238)	18	7	.41	+	16.98	2.61E-03
defense response by callose deposition in cell wall (GO:0052544)	16	6	.37	+	16.37	1.91E-02
defense response by cell wall thickening (GO:0052482)	17	6	.39	+	15.41	2.53E-02
negative regulation of cell death (GO:0060548)	33	11	.76	+	14.55	7.21E-06
indolalkylamine metabolic process (GO:0006586)	31	10	.71	+	14.08	5.00E-05
tryptophan metabolic process (GO:0006568)	31	10	.71	+	14.08	5.00E-05
defense response by callose deposition (GO:0052542)	25	8	.57	+	13.97	1.45E-03
response to chitin (GO:0010200)	138	43	3.16	+	13.60	3.82E-28
negative regulation of programmed cell death (GO:0043069)	26	8	.60	+	13.43	1.85E-03
indole-containing compound metabolic process (GO:0042430)	73	22	1.67	+	13.16	4.42E-13
cellular response to hypoxia (GO:0071456)	235	68	5.38	+	12.63	2.65E-44
cellular response to oxygen levels (GO:0071453)	237	68	5.43	+	12.53	4.22E-44
cellular response to decreased oxygen levels (GO:0036294)	237	68	5.43	+	12.53	4.22E-44
response to hypoxia (GO:0001666)	260	69	5.96	+	11.59	6.62E-43
defense response to bacterium, incompatible interaction (GO:0009816)	42	11	.96	+	11.43	5.97E-05
response to decreased oxygen levels (GO:0036293)	264	69	6.05	+	11.41	1.55E-42
response to oxygen levels (GO:0070482)	265	69	6.07	+	11.37	1.92E-42
indole-containing compound biosynthetic process (GO:0042435)	50	13	1.15	+	11.35	3.33E-06
response to molecule of bacterial origin (GO:0002237)	34	8	.78	+	10.27	1.03E-02
defense response to fungus, incompatible interaction (GO:0009817)	49	11	1.12	+	9.80	2.33E-04
response to oomycetes (GO:0002239)	87	18	1.99	+	9.03	5.83E-08
negative regulation of defense response (GO:0031348)	63	13	1.44	+	9.01	3.73E-05
callose localization (GO:0052545)	40	8	.92	+	8.73	2.92E-02
regulation of jasmonic acid mediated signaling pathway (GO:2000022)	41	8	.94	+	8.52	3.43E-02
regulation of cell death (GO:0010941)	83	16	1.90	+	8.42	1.89E-06
response to organonitrogen compound (GO:0010243)	246	47	5.63	+	8.34	6.19E-23
regulation of defense response to bacterium (GO:1900424)	43	8	.98	+	8.12	4.65E-02
polysaccharide localization (GO:0033037)	43	8	.98	+	8.12	4.65E-02
cellular biogenic amine metabolic process (GO:0006576)	62	11	1.42	+	7.75	1.86E-03
cellular amine metabolic process (GO:0044106)	62	11	1.42	+	7.75	1.86E-03
toxin metabolic process (GO:0009404)	71	12	1.63	+	7.38	9.19E-04
regulation of programmed cell death (GO:0043067)	66	11	1.51	+	7.28	3.22E-03
plant-type hypersensitive response (GO:0009626)	73	12	1.67	+	7.18	1.20E-03
host programmed cell death induced by symbiont (GO:0034050)	74	12	1.70	+	7.08	1.37E-03
response to nitrogen compound (GO:1901698)	305	49	6.99	+	7.01	4.68E-21
defense response, incompatible interaction (GO:0009814)	175	27	4.01	+	6.74	3.10E-10
response to drug (GO:0042493)	460	69	10.54	+	6.55	4.24E-29
immune response (GO:0006955)	330	49	7.56	+	6.48	1.01E-19
innate immune response (GO:0045087)	323	47	7.40	+	6.35	1.71E-18
auxin metabolic process (GO:0009850)	69	10	1.58	+	6.33	2.99E-02
immune system process (GO:0002376)	387	56	8.86	+	6.32	2.11E-22
programmed cell death (GO:0012501)	107	15	2.45	+	6.12	2.89E-04
positive regulation of defense response (GO:0031349)	94	13	2.15	+	6.04	2.34E-03
response to bacterium (GO:0009617)	483	65	11.06	+	5.88	8.09E-25
aging (GO:0007568)	139	18	3.18	+	5.65	4.71E-05
aromatic amino acid family metabolic process (GO:0009072)	85	11	1.95	+	5.65	2.89E-02
response to wounding (GO:0009611)	211	27	4.83	+	5.59	1.63E-08
positive regulation of response to biotic stimulus (GO:0002833)	86	11	1.97	+	5.58	3.20E-02
cellular response to drug (GO:0035690)	87	11	1.99	+	5.52	3.53E-02
regulation of response to biotic stimulus (GO:0002831)	174	22	3.99	+	5.52	1.84E-06
cell death (GO:0008219)	127	16	2.91	+	5.50	4.12E-04
response to karrikin (GO:0080167)	128	16	2.93	+	5.46	4.54E-04
leaf senescence (GO:0010150)	104	13	2.38	+	5.46	6.53E-03
defense response to bacterium (GO:0042742)	396	49	9.07	+	5.40	1.11E-16
positive regulation of response to external stimulus (GO:0032103)	89	11	2.04	+	5.40	4.29E-02
regulation of defense response (GO:0031347)	251	31	5.75	+	5.39	1.01E-09
regulation of response to external stimulus (GO:0032101)	179	22	4.10	+	5.37	2.97E-06
regulation of innate immune response (GO:0045088)	114	14	2.61	+	5.36	3.25E-03
response to salicylic acid (GO:0009751)	147	18	3.37	+	5.35	1.03E-04
regulation of immune system process (GO:0002682)	131	16	3.00	+	5.33	6.05E-04
plant organ senescence (GO:0090693)	110	13	2.52	+	5.16	1.15E-02
regulation of immune response (GO:0050776)	119	14	2.73	+	5.14	5.16E-03
response to jasmonic acid (GO:0009753)	169	17	3.87	+	4.39	3.10E-03
response to antibiotic (GO:0046677)	240	24	5.50	+	4.37	2.21E-05
regulation of response to stress (GO:0080134)	371	35	8.50	+	4.12	3.65E-08
response to external biotic stimulus (GO:0043207)	1317	122	30.17	+	4.04	1.55E-34
response to other organism (GO:0051707)	1317	122	30.17	+	4.04	1.55E-34
response to biotic stimulus (GO:0009607)	1330	122	30.47	+	4.00	3.80E-34
alpha-amino acid metabolic process (GO:1901605)	278	25	6.37	+	3.93	7.54E-05
interspecies interaction between organisms (GO:0044419)	1362	122	31.20	+	3.91	3.32E-33
cellular response to stress (GO:0033554)	1187	106	27.19	+	3.90	3.84E-28
defense response (GO:0006952)	1450	125	33.21	+	3.76	1.32E-32
defense response to other organism (GO:0098542)	1056	90	24.19	+	3.72	5.47E-22
response to oxidative stress (GO:0006979)	446	38	10.22	+	3.72	7.83E-08
cellular response to chemical stimulus (GO:0070887)	1431	121	32.78	+	3.69	1.19E-30
response to water (GO:0009415)	355	30	8.13	+	3.69	1.17E-05
response to water deprivation (GO:0009414)	347	29	7.95	+	3.65	2.67E-05
response to ethylene (GO:0009723)	270	22	6.18	+	3.56	2.42E-03
response to external stimulus (GO:0009605)	1748	136	40.04	+	3.40	1.58E-31
positive regulation of response to stimulus (GO:0048584)	232	18	5.31	+	3.39	4.39E-02
response to oxygen-containing compound (GO:1901700)	1534	117	35.14	+	3.33	1.06E-25
response to organic cyclic compound (GO:0014070)	290	22	6.64	+	3.31	7.23E-03
secondary metabolic process (GO:0019748)	327	24	7.49	+	3.20	4.40E-03
response to abiotic stimulus (GO:0009628)	2075	152	47.53	+	3.20	4.27E-33
response to acid chemical (GO:0001101)	1138	83	26.07	+	3.18	4.69E-16
response to chemical (GO:0042221)	2883	209	66.04	+	3.16	4.11E-48
response to stress (GO:0006950)	3575	246	81.89	+	3.00	4.84E-55
regulation of response to stimulus (GO:0048583)	690	47	15.81	+	2.97	4.58E-07
sulfur compound metabolic process (GO:0006790)	368	25	8.43	+	2.97	9.76E-03
response to organic substance (GO:0010033)	1888	128	43.25	+	2.96	5.54E-24
response to fungus (GO:0009620)	593	40	13.58	+	2.94	1.42E-05
cellular amino acid metabolic process (GO:0006520)	386	26	8.84	+	2.94	7.23E-03
response to abscisic acid (GO:0009737)	535	36	12.25	+	2.94	8.93E-05
response to alcohol (GO:0097305)	539	36	12.35	+	2.92	1.07E-04
response to inorganic substance (GO:0010035)	909	60	20.82	+	2.88	4.02E-09
cellular response to stimulus (GO:0051716)	2863	178	65.58	+	2.71	3.88E-31
defense response to fungus (GO:0050832)	515	32	11.80	+	2.71	2.71E-03
response to endogenous stimulus (GO:0009719)	1556	92	35.64	+	2.58	1.43E-12
response to temperature stimulus (GO:0009266)	593	35	13.58	+	2.58	4.18E-03
response to hormone (GO:0009725)	1538	89	35.23	+	2.53	1.84E-11
protein phosphorylation (GO:0006468)	981	56	22.47	+	2.49	4.10E-06
response to lipid (GO:0033993)	730	40	16.72	+	2.39	3.70E-03
response to stimulus (GO:0050896)	6086	323	139.41	+	2.32	2.45E-52
cellular response to organic substance (GO:0071310)	1021	52	23.39	+	2.22	6.67E-04
cellular response to endogenous stimulus (GO:0071495)	912	46	20.89	+	2.20	5.08E-03
phosphorylation (GO:0016310)	1344	66	30.79	+	2.14	4.66E-05
signal transduction (GO:0007165)	1711	83	39.19	+	2.12	8.71E-07
carboxylic acid metabolic process (GO:0019752)	933	45	21.37	+	2.11	2.03E-02
cellular response to hormone stimulus (GO:0032870)	893	43	20.46	+	2.10	3.79E-02
cell communication (GO:0007154)	1994	96	45.68	+	2.10	4.54E-08
oxoacid metabolic process (GO:0043436)	1060	51	24.28	+	2.10	3.86E-03
organic acid metabolic process (GO:0006082)	1069	51	24.49	+	2.08	6.45E-03
signaling (GO:0023052)	1745	83	39.97	+	2.08	2.18E-06
phosphate-containing compound metabolic process (GO:0006796)	1912	81	43.80	+	1.85	6.67E-04
phosphorus metabolic process (GO:0006793)	1956	82	44.80	+	1.83	6.26E-04
small molecule metabolic process (GO:0044281)	1603	65	36.72	+	1.77	4.59E-02
protein modification process (GO:0036211)	2421	93	55.46	+	1.68	3.79E-03
cellular protein modification process (GO:0006464)	2421	93	55.46	+	1.68	3.79E-03
organonitrogen compound metabolic process (GO:1901564)	4801	165	109.97	+	1.50	1.69E-04
biological regulation (GO:0065007)	6121	195	140.21	+	1.39	1.67E-03
regulation of biological process (GO:0050789)	5405	169	123.81	+	1.37	4.58E-02
cellular process (GO:0009987)	12857	384	294.51	+	1.30	4.26E-09
Unclassified (UNCLASSIFIED)	4383	70	100.40	-	.70	0.00E00
nucleobase-containing compound metabolic process (GO:0006139)	2168	15	49.66	-	.30	1.94E-05
macromolecule biosynthetic process (GO:0009059)	1325	8	30.35	-	.26	6.97E-03
organelle organization (GO:0006996)	1681	10	38.51	-	.26	1.72E-04
cellular macromolecule biosynthetic process (GO:0034645)	1269	7	29.07	-	.24	4.32E-03
nucleic acid metabolic process (GO:0090304)	1781	7	40.80	-	.17	2.45E-07
RNA metabolic process (GO:0016070)	1348	3	30.88	-	.10	9.02E-07
gene expression (GO:0010467)	1655	2	37.91	-	.05	8.05E-11
RNA processing (GO:0006396)	833	1	19.08	-	.05	4.54E-04

## Sheet: DownRegulated genes
Analysis Type:	PANTHER Overrepresentation Test (Released 20200407)
Annotation Version and Release Date:	GO Ontology database DOI: 10.5281/zenodo.3727280 Released 2020-03-23
Analyzed List:	upload_1 (Arabidopsis thaliana)
Reference List:	Arabidopsis thaliana (all genes in database)
Test Type:	FISHER
Correction:	BONFERRONI
Bonferroni count:	2822
GO biological process complete	Arabidopsis thaliana - REFLIST (27416)	upload_1 (172)	upload_1 (expected)	upload_1 (over/under)	upload_1 (fold Enrichment)	upload_1 (P-value)
response to far red light (GO:0010218)	51	7	.32	+	21.88	2.10E-04
protein-chromophore linkage (GO:0018298)	44	5	.28	+	18.11	3.83E-02
response to red light (GO:0010114)	71	7	.45	+	15.72	1.66E-03
response to blue light (GO:0009637)	95	9	.60	+	15.10	5.38E-05
response to red or far red light (GO:0009639)	212	12	1.33	+	9.02	5.21E-05
response to light stimulus (GO:0009416)	702	25	4.40	+	5.68	1.30E-08
response to radiation (GO:0009314)	727	25	4.56	+	5.48	2.69E-08
hormone-mediated signaling pathway (GO:0009755)	809	18	5.08	+	3.55	1.29E-02
response to abiotic stimulus (GO:0009628)	2075	46	13.02	+	3.53	1.06E-10
cellular response to hormone stimulus (GO:0032870)	893	19	5.60	+	3.39	1.29E-02
cellular response to endogenous stimulus (GO:0071495)	912	19	5.72	+	3.32	1.74E-02
cellular response to chemical stimulus (GO:0070887)	1431	25	8.98	+	2.78	1.18E-02
response to oxygen-containing compound (GO:1901700)	1534	25	9.62	+	2.60	3.83E-02
response to stimulus (GO:0050896)	6086	71	38.18	+	1.86	8.88E-05
Unclassified (UNCLASSIFIED)	4383	20	27.50	-	.73	0.00E00
